# Supplementary material for: Floral Volatile Organic Compounds and a List of Pollinators of Fallopia baldschuanica (Polygonaceae)
Source: MDPI journal article supplement (doi:10.3390/insects13100904), 2022-10-05
Supplement: s1 [file s1]

# Supplementary Material S1. Comparison of the identified organic compounds (VOCs) with the mass spectral library.

Numbers 1-18 correspond with Table 1.

1.

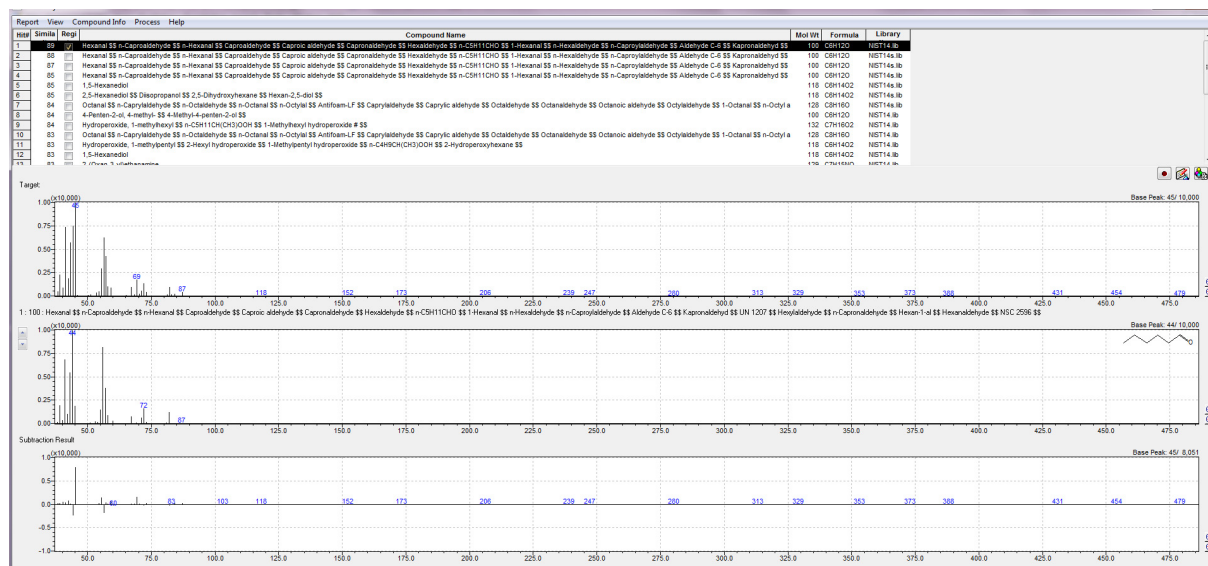

2.

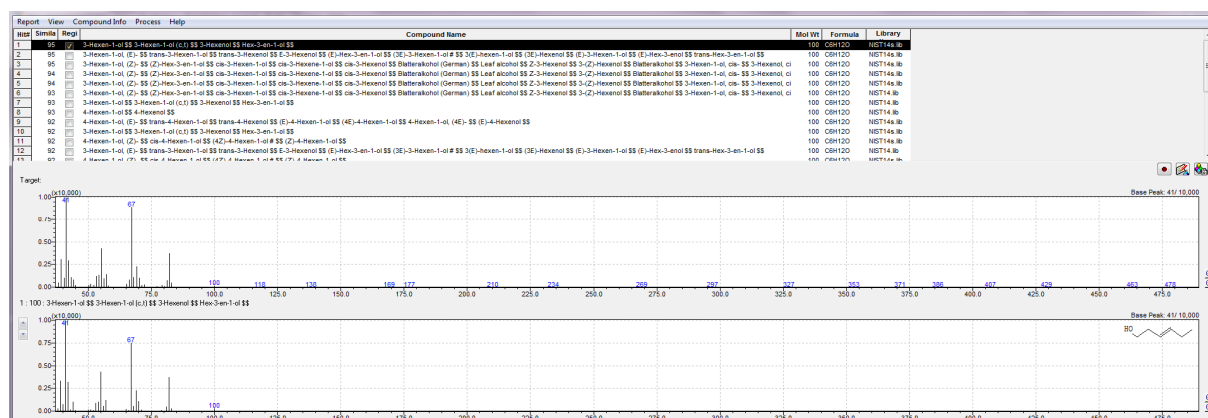

3.

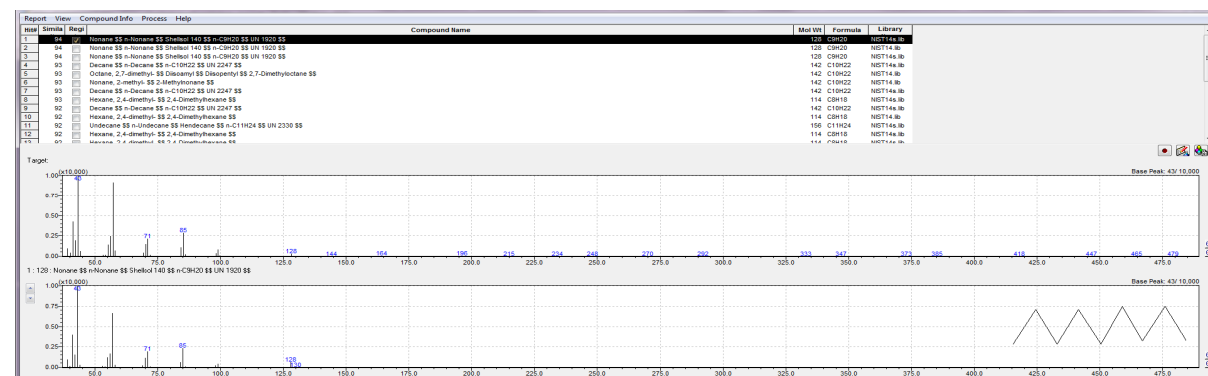

[illegible][illegible][illegible]

[illegible]

| Report View Compound Info Process Help |         |     |                                                                                                                         | Compound Name |  |  | Mol Wt | Formula | Library    |
|----------------------------------------|---------|-----|-------------------------------------------------------------------------------------------------------------------------|---------------|--|--|--------|---------|------------|
| Item                                   | Similar | Reg |                                                                                                                         |               |  |  |        |         |            |
| 1                                      | 95      | 95  | Decane S5 n-Decane S5 n-C19H22 S5 UN 2247 S5                                                                            |               |  |  | 142    | C19H22  | NIST14a.lb |
| 2                                      | 95      |     | Undecane S5 n-Undecane S5 Hendecane S5 n-C11H24 S5 UN 2330 S5                                                           |               |  |  | 158    | C11H24  | NIST14a.lb |
| 3                                      | 94      |     | Decane S5 n-Decane S5 n-C19H22 S5 UN 2247 S5                                                                            |               |  |  | 142    | C19H22  | NIST14a.lb |
| 4                                      | 94      |     | Undecane S5 n-Undecane S5 Hendecane S5 n-C11H24 S5 UN 2330 S5                                                           |               |  |  | 158    | C11H24  | NIST14a.lb |
| 5                                      | 94      |     | Decane S5 n-Decane S5 n-C19H22 S5 UN 2247 S5                                                                            |               |  |  | 142    | C19H22  | NIST14a.lb |
| 6                                      | 94      |     | Tridecane S5 n-Tridecane S5 Tridecane n S5                                                                              |               |  |  | 184    | C13H28  | NIST14a.lb |
| 7                                      | 93      |     | Decane S5 n-Decane S5 n-C19H22 S5 UN 2247 S5                                                                            |               |  |  | 142    | C19H22  | NIST14a.lb |
| 8                                      | 93      |     | Undecane S5 n-Undecane S5 Hendecane S5 n-C11H24 S5 UN 2330 S5                                                           |               |  |  | 158    | C11H24  | NIST14a.lb |
| 9                                      | 93      |     | Dodecane S5 n-Dodecane S5 Asakane 12 S5 Da 51-290453 S5 CH3(CH2)10CH3 S5 Dihexyl S5 Dihexyl S5 Duodecane S5 NSC 8714 S5 |               |  |  | 170    | C12H26  | NIST14a.lb |
| 10                                     | 93      |     | Undecane S5 n-Undecane S5 Hendecane S5 n-C11H24 S5 UN 2330 S5                                                           |               |  |  | 158    | C11H24  | NIST14a.lb |
| 11                                     | 93      |     | Undecane 2,10-dimethyl S5 2,10-Dimethylundecane S5 S5                                                                   |               |  |  | 184    | C13H28  | NIST14a.lb |
| 12                                     | 93      |     | Octane 4-ethyl S5 4-EthylOctane S5                                                                                      |               |  |  | 142    | C10H22  | NIST14a.lb |
| 13                                     | 93      |     | Dodecane S5 n-Dodecane S5 Asakane 12 S5 Da 51-290453 S5 CH3(CH2)10CH3 S5 Dihexyl S5 Dihexyl S5 Duodecane S5 NSC 8714 S5 |               |  |  | 170    | C12H26  | NIST14a.lb |

[illegible]

| Report View    | Compound Info                                                                                                                                                                                                                   | Process Help |
|----------------|---------------------------------------------------------------------------------------------------------------------------------------------------------------------------------------------------------------------------------|--------------|
| Real Time Data | Compound Name                                                                                                                                                                                                                   | Mat Ut       |
| 1              | 92 D-Limonene S5 Cyclohexene, 1-methyl-4-(1-methylethyl), (R)- S5 p-Menth-1,8-diene, (R)- S5 (+)-[R]-Limonene S5 (+)-[4R]-Limonene S5 (+)-p-Menth-1,8-diene S5 (+)-Limonene S5 (R)- S5 (+)-Limonene S5 Carvone S5 D-(-)-Limo    | 136 C10H16   |
| 2              | 92 D-Limonene S5 Cyclohexene, 1-methyl-4-(1-methylethyl), (R)- S5 p-Menth-1,8-diene, (R)- S5 (+)-[R]-Limonene S5 (+)-[4R]-Limonene S5 (+)-p-Menth-1,8-diene S5 (+)-Limonene S5 (R)- S5 (+)-Limonene S5 Carvone S5 D-(-)-Limo    | 136 C10H16   |
| 3              | 92 D-Limonene S5 Cyclohexene, 1-methyl-4-(1-methylethyl), (R)- S5 p-Menth-1,8-diene, (R)- S5 (+)-[R]-Limonene S5 (+)-[4R]-Limonene S5 (+)-p-Menth-1,8-diene S5 (+)-Limonene S5 (R)- S5 (+)-Limonene S5 Carvone S5 D-(-)-Limo    | 136 C10H16   |
| 4              | 92 Cyclohexene, 1-methyl-4-(1-methylethyl), (S)- S5 p-Menth-1,8-diene, (S)- S5 (+)-Limonene S5 Limonene S5 Limonene S5 4-isopropenyl-1-methyl-1-cyclohexene # S5                                                                | 136 C10H16   |
| 5              | 92 Cyclohexene, 1-methyl-4-(1-methylethyl), (S)- S5 p-Menth-1,8-diene, (S)- S5 (+)-Limonene S5 Caputene S5 Caputene S5 Cinen S5 Cinen S5 Dipentene S5 Dipentene S5 Eulimen S5 Kaudoen S5 Limonen S5 Neosol S5 p-Men             | 136 C10H16   |
| 6              | 92 Cyclohexene, 1-methyl-4-(1-methylethyl), (S)- S5 p-Menth-1,8-diene, (S)- S5 (+)-Limonene S5 Limonene S5 Limonene S5 4-isopropenyl-1-methyl-1-cyclohexene # S5                                                                | 136 C10H16   |
| 7              | 91 Cyclobutane, 1,2-bis(1-methylethyl), trans- S5 1,2-Diisopropenylcyclobutane # S5                                                                                                                                             | 136 C10H16   |
| 8              | 91 Cyclohexene, 1-methyl-4-(1-methylethyl), (S)- S5 p-Menth-1,8-diene, (S)- S5 (+)-Limonene S5 Limonene S5 Limonene S5 4-isopropenyl-1-methyl-1-cyclohexene # S5                                                                | 136 C10H16   |
| 9              | 90 Cyclobutane, 1,2-diisopropenyl, trans S5 1,2-Diisopropenylcyclobutane # S5                                                                                                                                                   | 136 C10H16   |
| 10             | 90 Limonene S5 Cyclohexene, 1-methyl-4-(1-methylethyl), (S)- S5 p-Menth-1,8-diene, (S)- S5 (+)-Limonene S5 Caputene S5 Caputene S5 Cinen S5 Cinen S5 Dipentene S5 Dipentene S5 Eulimen S5 Kaudoen S5 Limonen S5 Neosol S5 p-Men | 136 C10H16   |
| 11             | 90 Cyclohexanol, 1-methyl-4-(1-methylethyl), acetate S5 p-Menth-1,8-diene, (S)- S5 (+)-Limonene S5 Limonene S5 Limonene S5 4-isopropenyl-1-methyl-1-cyclohexene # S5                                                            | 136 C10H16   |
| 12             | 90 Cyclohexanol, 1-methyl-4-(1-methylethyl), S5 4-isopropenyl-1-methyl-1-cyclohexene # S5                                                                                                                                       | 136 C10H16   |
| 13             | 90 Cyclohexene, 1-methyl-4-(1-methylethyl), (R)- S5 p-Menth-1,8-diene, (R)- S5 (+)-[R]-Limonene S5 (+)-[4R]-Limonene S5 (+)-p-Menth-1,8-diene S5 (+)-Limonene S5 (R)- S5 (+)-Limonene S5 Carvone S5 D-(-)-Limo                  | 136 C10H16   |

  

Target

1: 136 D-Limonene S5 Cyclohexene, 1-methyl-4-(1-methylethyl), (R)- S5 p-Menth-1,8-diene, (R)- S5 (+)-[R]-Limonene S5 (+)-[4R]-Limonene S5 (+)-p-Menth-1,8-diene S5 (+)-Limonene S5 (R)- S5 (+)-Limonene S5 Carvone S5 D-(-)-Limonene, [D]- S5 Limonene, [L]- S5 (R)- 1-methyl-4-(1-methylethyl)cyclohexane S5 Dextro limonene S5 (R)- 4-isopropenyl-1-methyl-1-cyclohexene S5 4-isopropenyl-1-methyl-1-cyclohexene S5

[illegible][illegible]

13.

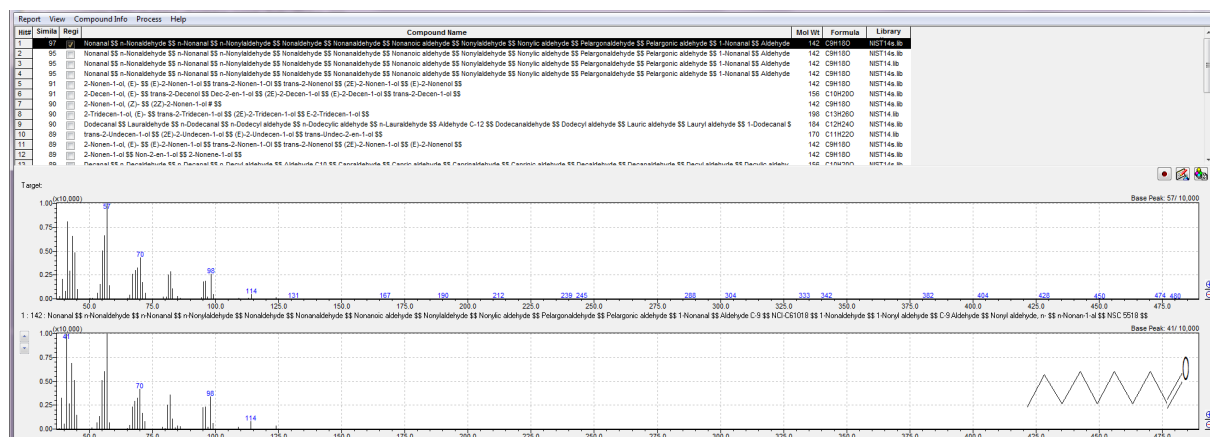

14.

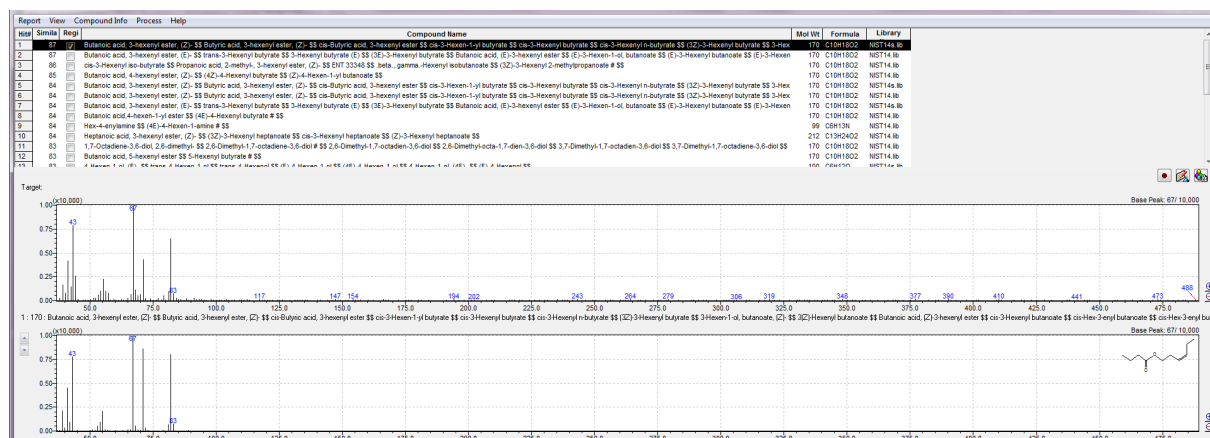

15.

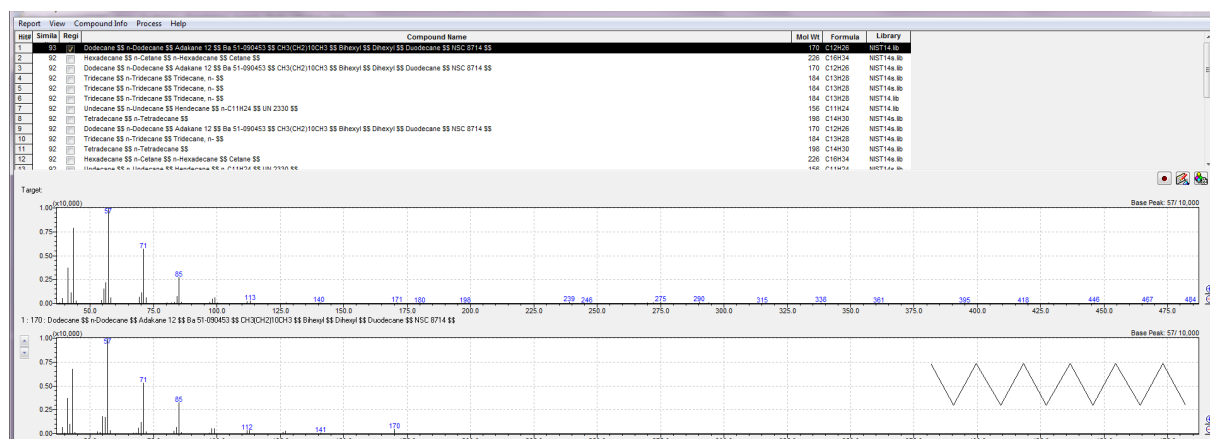

| Report | View  | Compound Info                                                                                                                                                                                                             | Process | Help     |            |
|--------|-------|---------------------------------------------------------------------------------------------------------------------------------------------------------------------------------------------------------------------------|---------|----------|------------|
| 1      | Table | Compound Name                                                                                                                                                                                                             | Mol Wt  | Formula  | Library    |
| 1      | 62    | cis-3-Hexenyl alpha-methylbutyrate S\$ Butanoic acid, 2-methyl-, 3-hexenyl ester, (Z)- S\$ (3Z)-3-Hexenyl 2-methylbutanoate # \$S                                                                                         | 164     | C11H20O2 | NIST14a.lb |
| 2      | 92    | n-Valeric acid cis-3-hexenyl ester S\$ cis-3-Hexenyl valerate S\$ Pentanoic acid, 3-hexenyl ester, (Z)- S\$ cis-3-Hexenyl n-valerate S\$ (Z)-3-Hexenyl-1-oil, pentanoate S\$ (Z)-3-Hexenyl pentanoate S\$ (Z)-3-          | 164     | C11H20O2 | NIST14a.lb |
| 3      | 92    | cis-3-Hexenyl alpha-methylbutyrate S\$ Butanoic acid, 2-methyl-, 3-hexenyl ester, (Z)- S\$ (3Z)-3-Hexenyl 2-methylbutanoate # \$S                                                                                         | 164     | C11H20O2 | NIST14a.lb |
| 4      | 92    | Pentanoic acid, 4-hexen-1-yl ester S\$ (E)-4-Hexenyl pentanoate # \$S                                                                                                                                                     | 164     | C11H20O2 | NIST14a.lb |
| 5      | 90    | cis-3-Hexenyl isovalerate S\$ Isovaleric acid cis-3-hexenyl ester S\$ Butanoic acid, 3-methyl-, 3-hexenyl ester, (Z)- S\$ AD-35966 S\$ cis-3-Hexenyl 3-methylbutanoate S\$ cis-3-Hexenyl iso-valer                        | 164     | C11H20O2 | NIST14a.lb |
| 6      | 90    | Formic acid, cyclohexyl ester S\$ Cyclohexyl formate S\$ Cyclohexyl ester of formic acid S\$ Formic acid, cyclohexyl ester (purified) S\$                                                                                 | 133     | C7H12O2  | NIST14a.lb |
| 7      | 89    | cis-3-Hexenyl isovalerate S\$ Isovaleric acid cis-3-hexenyl ester S\$ Butanoic acid, 3-methyl-, 3-hexenyl ester, (Z)- S\$ AD-35966 S\$ cis-3-Hexenyl 3-methylbutanoate S\$ cis-3-Hexenyl iso-valer                        | 164     | C11H20O2 | NIST14a.lb |
| 8      | 89    | cis-3-Hexenyl isovalerate S\$ Isovaleric acid cis-3-hexenyl ester S\$ Butanoic acid, 3-methyl-, 3-hexenyl ester, (Z)- S\$ AD-35966 S\$ cis-3-Hexenyl 3-methylbutanoate S\$ cis-3-Hexenyl iso-valer                        | 164     | C11H20O2 | NIST14a.lb |
| 9      | 89    | Formic acid, cyclohexyl ester S\$ Cyclohexyl formate S\$ Cyclohexyl ester of formic acid S\$ Formic acid, cyclohexyl ester (purified) S\$                                                                                 | 133     | C7H12O2  | NIST14a.lb |
| 10     | 88    | cis-3-Hexenyl isovalerate S\$ Isovaleric acid cis-3-hexenyl ester S\$ Butanoic acid, 3-methyl-, 3-hexenyl ester, (Z)- S\$ AD-35966 S\$ cis-3-Hexenyl 3-methylbutanoate S\$ cis-3-Hexenyl iso-valer                        | 164     | C11H20O2 | NIST14a.lb |
| 11     | 88    | n-Valeric acid cis-3-hexenyl ester S\$ cis-3-Hexenyl valerate S\$ Pentanoic acid, 3-hexenyl ester, (Z)- S\$ cis-3-Hexenyl n-valerate S\$ (Z)-3-Hexenyl-1-oil, pentanoate S\$ (Z)-3-Hexenyl pentanoate S\$ (Z)-3-          | 164     | C11H20O2 | NIST14a.lb |
| 12     | 87    | Pentanoic acid, 4-hexen-1-yl ester S\$ (E)-4-Hexenyl pentanoate # \$S                                                                                                                                                     | 165     | C11H20O2 | NIST14a.lb |
| 13     | 87    | 1 Hexenyl 3-ol isomerase, (P); 6E Hexenyl 3-ol isomerase, (P); 6E hex-3-enal; Hexenyl isomerase 6E cis-3 Hexenyl isomerase 6E Dimeric acid cis-3 Hexenyl ester 6E beta, gamma Hexenyl isomerase cis-6E cis-3 Hexenyl 6-ol | 165     | C10H18O2 | NIST14a.lb |

  

Target

Base Peak: 671.1000

1: 184: cis-3-Hexenyl alpha-methylbutyrate S\$ Butanoic acid, 2-methyl-, 3-hexenyl ester, (Z)- S\$ (3Z)-3-Hexenyl 2-methylbutanoate # \$S

Base Peak: 671.1000

CCCCC/C=C\CCCC(=O)OC(C)CC

Report View Compound Info Process Help

| Rank | Similarity | Regio                                                                                                                                                                                                                                                                                                         | Compound Name | Mol Wt                                         | Formula | Library |
|------|------------|---------------------------------------------------------------------------------------------------------------------------------------------------------------------------------------------------------------------------------------------------------------------------------------------------------------|---------------|------------------------------------------------|---------|---------|
| 1    | 91         | (Z)-[2-Hex-3-en-1-yl 2-methylbut-2-enoate] \$S\$ 2-Butenic acid, 2-methyl-, (Z)-; 3-Hexen-1-yl ester-, (Z)-; \$S\$ 2-Butenic acid, 2-methyl-, (Z)-; 3-Hexenyl ester-, (Z)-; (Z)-3-Hexenyl 2-methylbut-2-enoate                                                                                                | 162           | C <sub>11</sub> H <sub>18</sub> O <sub>2</sub> | NIST14a |         |
| 2    | 88         | (Z)-Hex-3-enyl (E)-2-methylbut-2-enoate                                                                                                                                                                                                                                                                       | 162           | C <sub>11</sub> H <sub>18</sub> O <sub>2</sub> | NIST14a |         |
| 3    | 88         | Hexenyl angolate, 4Z                                                                                                                                                                                                                                                                                          | 162           | C <sub>11</sub> H <sub>18</sub> O <sub>2</sub> | NIST14a |         |
| 4    | 88         | (E)-Hex-3-enyl (E)-2-methylbut-2-enoate                                                                                                                                                                                                                                                                       | 162           | C <sub>11</sub> H <sub>18</sub> O <sub>2</sub> | NIST14a |         |
| 5    | 87         | Hexenyl ligate, 4Z                                                                                                                                                                                                                                                                                            | 162           | C <sub>11</sub> H <sub>18</sub> O <sub>2</sub> | NIST14a |         |
| 6    | 84         | Cyclohexane, 3-propenyl- \$S\$ Cyclohexane, allyl- \$S\$ Allylcyclohexane \$S\$ 1-Cyclohexyl-2-propene \$S\$ 1-Propene, 3-cyclohexyl- \$S\$ 3-Cyclohexyl-1-propene \$S\$ Acetic acid, trifluoro-, cyclohexyl ester \$S\$ Trifluoroacetic acid, cyclohexyl ester \$S\$ Cyclohexyl trifluoroacetate \$S\$ \$S\$ | 124           | C <sub>8</sub> H <sub>16</sub>                 | NIST14a |         |
| 7    | 84         | Cyclohexane, chloro- \$S\$ Chlorocyclohexane \$S\$ Cyclohexyl chloride \$S\$ Monochlorocyclohexane \$S\$                                                                                                                                                                                                      | 116           | C <sub>6</sub> H <sub>11</sub> Cl              | NIST14a |         |
| 8    | 83         | Cyclohexane, chloro- \$S\$ Chlorocyclohexane \$S\$ Cyclohexyl chloride \$S\$ Monochlorocyclohexane \$S\$                                                                                                                                                                                                      | 116           | C <sub>6</sub> H <sub>11</sub> Cl              | NIST14a |         |
| 9    | 83         | Cyclohexane, (1-methylallyl)- \$S\$ Cyclohexane, isopropyl- \$S\$ Isopropylcyclohexane \$S\$ Neohydrocyclohexane \$S\$ Norhamthane \$S\$                                                                                                                                                                      | 126           | C <sub>9</sub> H <sub>18</sub>                 | NIST14a |         |
| 10   | 83         | Cyclohexane, 2-propenyl- \$S\$ Cyclohexane, allyl- \$S\$ Allylcyclohexane \$S\$ 1-Cyclohexyl-2-propene \$S\$ 1-Propene, 3-cyclohexyl- \$S\$ 3-Cyclohexyl-1-propene \$S\$                                                                                                                                      | 124           | C <sub>8</sub> H <sub>16</sub>                 | NIST14a |         |
| 11   | 83         | Vinylcyclohexyl ether \$S\$ Cyclohexane, (ethenyl)- \$S\$ Vinylcyclohexane \$S\$ \$S\$                                                                                                                                                                                                                        | 126           | C <sub>8</sub> H <sub>16</sub> O               | NIST14a |         |
| 12   | 83         | Cyclohexane, 1-methyl- \$S\$ Cyclohexane, ethyl- \$S\$ Ethylcyclohexane \$S\$ 1-Cyclohexyl-1-methane \$S\$ 1-Methane, 3-cyclohexyl- \$S\$ 3-Cyclohexyl-1-methane \$S\$                                                                                                                                        | 114           | C <sub>8</sub> H <sub>16</sub>                 | NIST14a |         |

Target

Base Peak: 671.10000

1: 182: (Z)-[2-Hex-3-en-1-yl 2-methylbut-2-enoate] \$S\$ 2-Butenic acid, 2-methyl-, (Z)-; 3-Hexen-1-yl ester-, (Z)-; \$S\$ 2-Butenic acid, 2-methyl-, (Z)-; 3-Hexenyl ester-, (Z)-; (Z)-3-Hexenyl 2-methylbut-2-enoate \$S\$

Base Peak: 821.10000

[illegible]

## Supplementary material S2. The description of ecological indices used for data analysis.

The **dominance index ( $d$ )** of each species was calculated according to the formula:

$$d = \frac{n_i}{N}$$

where  $n_i$  is the abundance of individuals belonging to the  $i$ th taxa and  $N$  – the total abundance of all taxa.

The **Berger-Parker dominance index ( $D$ )** was calculated according to the formula:

$$D = \frac{n_{max}}{N}$$

where  $n_{max}$  is the abundance of the most abundant species taxa and  $N$  – is the total abundance of all taxa.

The **Shannon-Weaver ( $H'$ )** index was calculated according to the following formula:

$$H' = - \sum_{i=1}^R p_i \ln p_i$$

where  $p_i$  is the proportion of individuals belonging to the  $i$ th taxa.

The **Pielou ( $J$ )** index was calculated according to the formula:

$$J = \frac{H'}{\ln(S)}$$

where  $H'$  is the Shannon-Weaver index and  $S$  is the total number of species in a sample.

The **Margalef's species richness ( $S$ )** index was calculated according to the following formula:

$$S = \frac{s - 1}{\ln(N)}$$

where  $s$  is the total number of species in a sample and  $N$  the total number of individuals in the sample.

The **species stability ( $C$ )** was calculated according to the following formula:

$$C = 200 \frac{n_a}{N}$$

where  $n_a$  is the total number of samples with species and  $N$  is the total number of samples.

The **Jaccard similarity index ( $SJ$ )** was calculated according to the formula:

$$SJ = \frac{c}{a + b + c}$$

where  $c$  is the number of shared species between the two sites and  $a$  and  $b$  are the number of species unique to each site.

## References

- Berger, W.H., Parker F.L. Diversity of Planktonic Foraminifera in Deep Sea Sediments. *Science* **1970**, 168, 1345. <https://doi.org/10.1126/science.168.3937.1345>.
- Shannon, C.E. A Mathematical Theory of Communication. *Bell Syst. Tech. J.* **1948**, 27, 379-423. <https://doi.org/10.1002/j.1538-7305.1948.tb01338.x>
- Pielou, E.C. The measurement of diversity in different types of biological collections. *J. Theor. Biol.* **1966**, 13, 131-144. [https://doi.org/10.1016/0022-5193\(66\)90013-0](https://doi.org/10.1016/0022-5193(66)90013-0)
- Margalef, R., Information Theory in Ecology. *General Systems* **1958**, 3, 36-71.
- Trojan, P. *General Ecology (Ekologia ogólna)*; PWN Publishing: Warsaw, Poland, 1980.
- Jaccard, P. The Distribution of the Flora of the Alpine Zone. *New Phytologist* **1912**, 11, 37-50. <http://dx.doi.org/10.1111/j.1469-8137.1912.tb05611.x>
