# Supplementary material for: Floral Volatile Organic Compounds and a List of Pollinators of Fallopia baldschuanica (Polygonaceae)
Source: MDPI journal article supplement (doi:10.3390/insects13100904), 2022-10-05
Supplement: s1 [file s1]

**Supplementary Figure S1.** The CCA biplot shows the taxa abundance in relation to the date and time of observations in 5 sites in 2019.

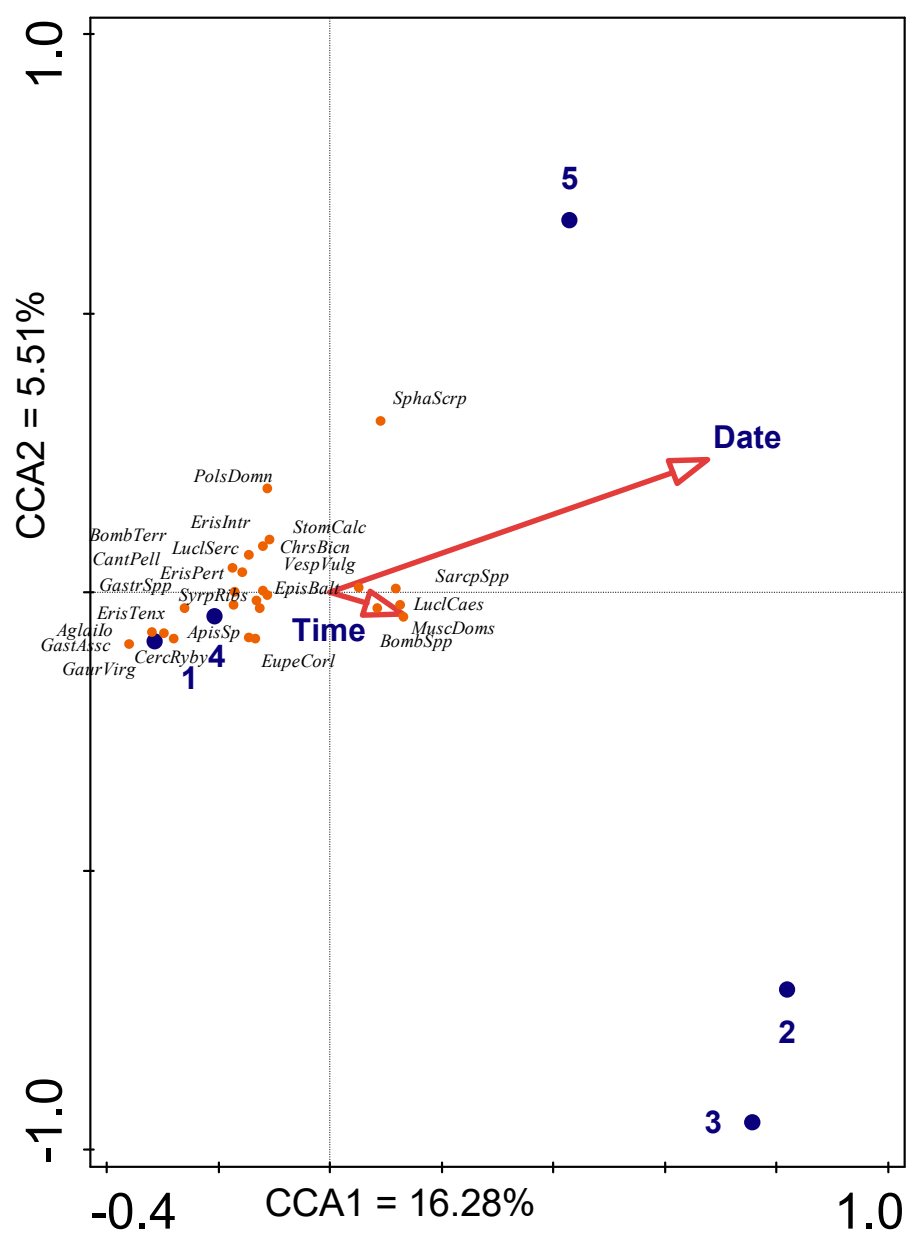

The full species name is given in Table S1;

Date – study period from 5.08.2019-24.10.2020;

Time – time of the day: 9:00 a.m. - 6:00 p.m.

**Supplementary Figure S2.** The CCA biplot shows the taxa abundance in relation to the date and time of observations in 5 sites in 2020.

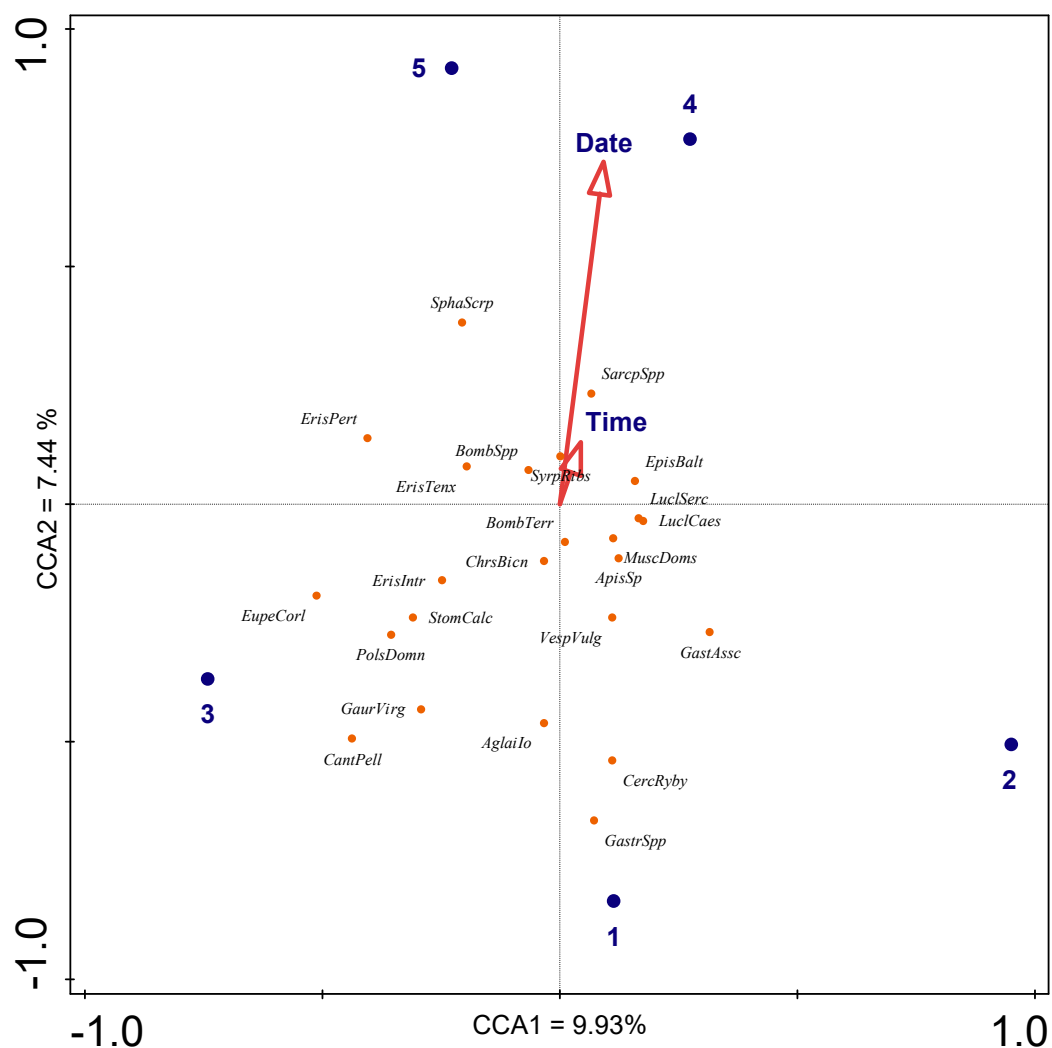

The full species name is given in Table S1;

Date – study period from 5.08.2019-24.10.2020;

Time – time of the day: 9:00 a.m. - 6:00 p.m.

**Supplementary Table S1.** List of floral visitors and true pollinators of *Fallopia baldschuanica* in Wrocław, SW Poland.

| Insect order | Family         | Species                         | Abbreviation    |
|--------------|----------------|---------------------------------|-----------------|
| Hymenoptera  | Apidae         | <i>Apis sp.*</i>                | <i>ApisSp</i>   |
|              |                | <i>Bombus sp.*</i>              | <i>BombSpp</i>  |
|              |                | <i>Bombus terrestris*</i>       | <i>BombTerr</i> |
|              | Crabronidae    | <i>Cerceris rybyensis*</i>      | <i>CercRyby</i> |
|              | Gasteruptiidae | <i>Gasteruption assectator*</i> | <i>GastAssc</i> |
|              |                | <i>Gasteruption spp.*</i>       | <i>GastrSpp</i> |
|              | Vespidae       | <i>Vespula vulgaris*</i>        | <i>VespVulg</i> |
|              |                | <i>Polistes dominula*</i>       | <i>PolsDomn</i> |
| Diptera      | Calliphoridae  | <i>Lucilia caesar*</i>          | <i>LuclCaes</i> |
|              |                | <i>Lucilia sericata*</i>        | <i>LuclSerc</i> |
|              | Muscidae       | <i>Musca domestica*</i>         | <i>MuscDoms</i> |
|              |                | <i>Stomoxys calcitrans*</i>     | <i>StomCalc</i> |
|              | Sarcophagidae  | <i>Sarcophaga spp.*</i>         | <i>SarcpSpp</i> |
|              | Syrphidae      | <i>Chrysotoxum bicinctum*</i>   | <i>ChrsBicn</i> |
|              |                | <i>Eupeodes corollae*</i>       | <i>EupeCorl</i> |
|              |                | <i>Episyrphus balteatus*</i>    | <i>EpiBalt</i>  |
|              |                | <i>Eristalis intricaria*</i>    | <i>ErisIntr</i> |
|              |                | <i>Eristalis tenax*</i>         | <i>ErisTenx</i> |
|              |                | <i>Eristalis pertinax*</i>      | <i>ErisPert</i> |
|              |                | <i>Sphaerophoria scripta*</i>   | <i>SphaScrp</i> |
|              |                | <i>Syrphus ribesii*</i>         | <i>SyprRibs</i> |
| Coleoptera   | Cantharidae    | <i>Cantharis pellucida</i>      | <i>CantPell</i> |
|              | Cerambycidae   | <i>Gaurotes virginea</i>        | <i>GaurVirg</i> |
| Lepidoptera  | Nymphalidae    | <i>Aglais io</i>                | <i>AglaiIo</i>  |

Abbreviation: \* true pollinators

**Supplementary Table S2.** The statistics of the Canonical Correspondence Analysis (CCA) for 2019.

|                                  | CCA1            | CCA2  | CCA3   | CCA4   |
|----------------------------------|-----------------|-------|--------|--------|
| Eigenvalues                      | 0.094           | 0.031 | 0.0092 | 0.0067 |
| Explained variation (cumulative) | 16.28           | 21.59 | 23.18  | 24.34  |
| Pseudo-canonical correlation     | 0.85            | 0.79  | 0.54   | 0.50   |
| Total variation                  | 0.58            |       |        |        |
| Explanatory variables variance   | 25.24%          |       |        |        |
| Significance of the axes         | F=19.4, P=0.002 |       |        |        |

**Supplementary Table S3.** The statistics of the Canonical Correspondence Analysis (CCA) for 2020.

|                                  | CCA1            | CCA2  | CCA3  | CCA4  |
|----------------------------------|-----------------|-------|-------|-------|
| Eigenvalues                      | 0.074           | 0.055 | 0.034 | 0.019 |
| Explained variation (cumulative) | 9.93            | 17.37 | 21.91 | 24.45 |
| Pseudo-canonical correlation     | 0.82            | 0.83  | 0.77  | 0.63  |
| Total variation                  | 0.74            |       |       |       |
| Explanatory variables variance   | 26.18%          |       |       |       |
| Significance of the axes         | F=27.3, P=0.002 |       |       |       |
